# Supplementary material for: A National Retrospective Study of Antidepressants’ Effects on Overdose and Self-Harm Among Adults Treated With Opioid Analgesics
Source: Atypon-hosted journal article supplement (doi:10.1176/appi.ps.20220070), 2022-06-30
Supplement: appi.ps.20220070.ds001.pdf [file appi.ps.20220070.ds001.pdf]

This supplementary material has been provided by the authors to provide readers additional information about their work.

**eAppendix A. Supplement for inclusion and exclusion diagnoses**

**Appendix Table A1: Exclusion Diagnoses for Opioid-Antidepressant Analyses**

| ICD-10 Code | ICD-9 Code        | Description                                                                      | Notes                                                                                                                                                   |
|-------------|-------------------|----------------------------------------------------------------------------------|---------------------------------------------------------------------------------------------------------------------------------------------------------|
| F20.*       | 295.*             | Schizophrenia                                                                    | <a href="http://www.icd9data.com/2012/Volume1/290-319/295-299/295/default.htm">http://www.icd9data.com/2012/Volume1/290-319/295-299/295/default.htm</a> |
| F23.*       | 298.3/298.4/298.8 | Brief Psychotic Disorder                                                         | <a href="https://www.icd10data.com/Convert/F23">https://www.icd10data.com/Convert/F23</a>                                                               |
| F24.*       | 297.3             | Shared Psychotic Disorder                                                        | <a href="https://www.icd10data.com/Convert/F24">https://www.icd10data.com/Convert/F24</a>                                                               |
| F25.*       | 295.7             | Schizoaffective Disorders                                                        | <a href="https://www.icd10data.com/Convert/F25.0">https://www.icd10data.com/Convert/F25.0</a>                                                           |
| F28.*       | 298.9             | Other psychotic disorder not due to a substance or known physiological condition | <a href="https://www.icd10data.com/Convert/F28">https://www.icd10data.com/Convert/F28</a>                                                               |
| F29.*       | 298.9             | Unspecified psychosis not due to a substance or known physiological condition    | <a href="https://www.icd10data.com/Convert/F29">https://www.icd10data.com/Convert/F29</a>                                                               |
| F30.*       | 296.06            | Manic episode                                                                    | <a href="https://www.icd10data.com/Convert/F30.4">https://www.icd10data.com/Convert/F30.4</a>                                                           |
| F31.*       | 296.05            | Bipolar disorder                                                                 | <a href="https://www.icd10data.com/Convert/F30.3">https://www.icd10data.com/Convert/F30.3</a>                                                           |
| F34.0       | 301.13            | Cyclothymic disorder                                                             | <a href="https://www.icd10data.com/Convert/F34.0">https://www.icd10data.com/Convert/F34.0</a>                                                           |

Notes: \* indicates all subcodes after the decimal point should also be excluded from the denominator. Individuals were excluded if they had at least one of these diagnoses recorded within the 6 months before the start of the OA episode, or the 12 months following the start of the OA episode.

**Appendix Table A2: Inclusion Depression Diagnoses for Opioid-Antidepressant Analyses**

| <b>ICD-10 Code</b>                        | <b>ICD-9 Code</b> | <b>Description</b>                       | <b>Notes</b>                                                                                                                                                                                                                               |
|-------------------------------------------|-------------------|------------------------------------------|--------------------------------------------------------------------------------------------------------------------------------------------------------------------------------------------------------------------------------------------|
| F32.0/F32.1/F32.2/F32.3/F32.4/F32.5/F32.9 | 296.2*            | MDD single episode (and all subcodes)    | ICD9-ICD10 crosswalk from NBER:<br><a href="https://data.nber.org/data/icd9-icd-10-cm-and-pcs-crosswalk-general-equivalence-mapping.html">https://data.nber.org/data/icd9-icd-10-cm-and-pcs-crosswalk-general-equivalence-mapping.html</a> |
| F33.0/F33.1/F33.2/F33.3/F33.4/F33.9       | 296.3*            | MDD recurrent episode (and all subcodes) |                                                                                                                                                                                                                                            |
| F34.1                                     | 300.4             | Dysthymic disorder                       |                                                                                                                                                                                                                                            |

Notes: \* indicates all subcodes after the decimal point should also be included in the denominator. Individuals with an OA episode were eligible for inclusion in our sample if they had an ED or inpatient visit in the 6 months prior to the start of the OA episode with a depression diagnosis in any position on a claim.

## eAppendix B. Supplement for ICD-9 and ICD-10 codes for adverse events

**Appendix Table B1:** ICD-9 and ICD-10 of the adverse events

| Category                                    | ICD-9 Groups Included                                                                                                                                                                                                                                                                                                                                                                                                                                                                                                                                                                                                                                                                                                                       | ICD-10 Groups Included                                                                                                                                                                                                                                                                                                                                                                                                                                                                                                                                                                                                                                                                                                                                                                                                                                                                                                                                                                                                                                                                                                                                                                                                                                                                                                                                                                                                                                                                                                                                                                                                                                       |
|---------------------------------------------|---------------------------------------------------------------------------------------------------------------------------------------------------------------------------------------------------------------------------------------------------------------------------------------------------------------------------------------------------------------------------------------------------------------------------------------------------------------------------------------------------------------------------------------------------------------------------------------------------------------------------------------------------------------------------------------------------------------------------------------------|--------------------------------------------------------------------------------------------------------------------------------------------------------------------------------------------------------------------------------------------------------------------------------------------------------------------------------------------------------------------------------------------------------------------------------------------------------------------------------------------------------------------------------------------------------------------------------------------------------------------------------------------------------------------------------------------------------------------------------------------------------------------------------------------------------------------------------------------------------------------------------------------------------------------------------------------------------------------------------------------------------------------------------------------------------------------------------------------------------------------------------------------------------------------------------------------------------------------------------------------------------------------------------------------------------------------------------------------------------------------------------------------------------------------------------------------------------------------------------------------------------------------------------------------------------------------------------------------------------------------------------------------------------------|
| Self-harm not related to poisoning          | E9506, E9507, E9508, E9509, E951.*, E952.*, E953.*, E954.*, E955.*, E956.*, E957.*, E958.*                                                                                                                                                                                                                                                                                                                                                                                                                                                                                                                                                                                                                                                  | T14.91, T14.91*, X71.*, X72.*, X73.*, X74.*, X75.*, X76.*, X77.*, X78.*, X79.*, X80.*, X81.*, X82.*, X83.*                                                                                                                                                                                                                                                                                                                                                                                                                                                                                                                                                                                                                                                                                                                                                                                                                                                                                                                                                                                                                                                                                                                                                                                                                                                                                                                                                                                                                                                                                                                                                   |
| Opioid poisonings                           | 9650, 96500, 96501, 96502, 96509, E9500, E9800, E8500, E8501, E8502                                                                                                                                                                                                                                                                                                                                                                                                                                                                                                                                                                                                                                                                         | <i>Intentional opioid poisonings:</i> T40.0X2*, T40.1X2*, T40.2X2*, T40.3X2*, T40.4X2*<br><i>Unintentional opioid poisonings:</i> T40.0X1*, T40.1X1*, T40.2X1*, T40.3X1*, T40.4X1*<br><i>Opioid poisonings unclear intent:</i> T40.0X4*, T40.1X4*, T40.2X4*, T40.3X4*, T40.4X4*                                                                                                                                                                                                                                                                                                                                                                                                                                                                                                                                                                                                                                                                                                                                                                                                                                                                                                                                                                                                                                                                                                                                                                                                                                                                                                                                                                              |
| Non-opioid controlled substances poisonings | 9694, 9670, 97081, E9501, E9801, E851, E8532                                                                                                                                                                                                                                                                                                                                                                                                                                                                                                                                                                                                                                                                                                | <i>Intentional non-opioid controlled substances poisonings:</i> T40.5X2*, T40.60X2*, T40.69X2*, T40.7X2*, T40.8X2*, T40.90X2*, T40.99X2*, T42.3X2*, T42.4X2*, T43.642*<br><br><i>Unintentional non-opioid controlled substances poisonings:</i> T40.5X1*, T40.60X1*, T40.69X1*, T40.7X1*, T40.8X1*, T40.90X1*, T40.99X1*, T42.3X1*, T42.4X1*, T43.641*<br><br><i>Non-opioid controlled substances poisonings unclear intent:</i> T40.5X4*, T40.60X4*, T40.69X4*, T40.7X4*, T40.8X4*, T40.90X4*, T40.99X4*, T42.3X4*, T42.4X4*, T43.644*                                                                                                                                                                                                                                                                                                                                                                                                                                                                                                                                                                                                                                                                                                                                                                                                                                                                                                                                                                                                                                                                                                                      |
| Other poisonings                            | 960.*, 961.*, 962.*, 963.*, 964.*, 9651, 9654, 9655, 9656, 96561, 96569, 9657, 9658, 9659, 966.*, 9671, 9672, 9673, 9674, 9675, 9676, 9678, 9679, 968.*, 9690, 96900, 96901, 96902, 96903, 96904, 96905, 96909, 9691, 9692, 9693, 9695, 9696, 9697, 96970, 96971, 96972, 96973, 96979, 9698, 9699, 9700, 9701, 9708, 97089, 9709, 971.*, 972.*, 973.*, 974.*, 975.*, 976.*, 977.*, 978.*, 979.*, E9502, E9503, E9504, E9505, E9802, E9803, E9804, E9805, E9806, E9807, E9808, E9809, E981, E9810, E9811, E9818, E982, E9820, E9821, E9828, E9829, E8503, E8504, E8505, E8506, E8507, E8508, E8509, E852, E8520, E8521, E8522, E8523, E8524, E8525, E8528, E8529, E853, E8530, E8531, E8538, E8539, E854, E8540, E8541, E8542, E8543, E8548, | <i>Intentional other poisonings:</i> T36.0X2*, T36.1X2*, T36.2X2*, T36.3X2*, T36.4X2*, T36.5X2*, T36.6X2*, T36.7X2*, T36.8X2*, T36.92*, T37.0X2*, T37.1X2*, T37.2X2*, T37.3X2*, T37.4X2*, T37.5X2*, T37.8X2*, T37.92*, T38.0X2*, T38.1X2*, T38.2X2*, T38.3X2*, T38.4X2*, T38.5X2*, T38.6X2*, T38.7X2*, T38.802*, T38.812*, T38.892*, T38.902*, T38.992*, T39.012*, T39.092*, T39.1X2*, T39.2X2*, T39.312*, T39.392*, T39.4X2*, T39.8X2*, T39.92*, T41.0X2*, T41.1X2*, T41.202*, T41.292*, T41.3X2*, T41.42*, T41.5X2*, T42.0X2*, T42.1X2*, T42.2X2*, T42.5X2*, T42.6X2*, T42.72*, T42.8X2*, T43.012*, T43.022*, T43.1X2*, T43.202*, T43.212*, T43.222*, T43.292*, T43.3X2*, T43.4X2*, T43.502*, T43.592*, T43.602*, T43.612*, T43.622*, T43.632*, T43.692*, T43.8X2*, T43.92*, T44.0X2*, T44.1X2*, T44.2X2*, T44.3X2*, T44.4X2*, T44.5X2*, T44.6X2*, T44.7X2*, T44.8X2*, T44.902*, T44.992*, T45.0X2*, T45.1X2*, T45.2X2*, T45.3X2*, T45.4X2*, T45.512*, T45.522*, T45.602*, T45.612*, T45.622*, T45.692*, T45.7X2*, T45.8X2*, T45.92*, T46.0X2*, T46.1X2*, T46.2X2*, T46.3X2*, T46.4X2*, T46.5X2*, T46.6X2*, T46.7X2*, T46.8X2*, T46.902*, T46.992*, T47.0X2*, T47.1X2*, T47.2X2*, T47.3X2*, T47.4X2*, T47.5X2*, T47.6X2*, T47.7X2*, T47.8X2*, T47.92*, T48.0X2*, T48.1X2*, T48.202*, T48.292*, T48.3X2*, T48.4X2*, T48.5X2*, T48.6X2*, T48.902*, T48.992*, T49.0X2*, T49.1X2*, T49.2X2*, T49.3X2*, T49.4X2*, T49.5X2*, T49.6X2*, T49.7X2*, T49.8X2*, T49.92*, T50.0X2*, T50.1X2*, T50.2X2*, T50.3X2*, T50.4X2*, T50.5X2*, T50.6X2*, T50.7X2*, T50.8X2*, T50.A12*, T50.A22*, T50.A92*, T50.B12*, T50.B92*, T50.Z12*, T50.Z92*, T50.902*, T50.912*, T50.992* |

---

E855, E8550, E8551, E8552, E8553,  
E8554, E8555, E8556, E8558, E8559,  
E856, E857, E858, E8580, E8581, E8582,  
E8583, E8584, E8585, E8586, E8587,  
E8588, E8589

*Unintentional other poisonings:* T36.0X1\*, T36.1X1\*, T36.2X1\*, T36.3X1\*, T36.4X1\*, T36.5X1\*,  
T36.6X1\*, T36.7X1\*, T36.8X1\*, T36.91\*, T37.0X1\*, T37.1X1\*, T37.2X1\*, T37.3X1\*, T37.4X1\*,  
T37.5X1\*, T37.8X1\*, T37.91\*, T38.0X1\*, T38.1X1\*, T38.2X1\*, T38.3X1\*, T38.4X1\*, T38.5X1\*,  
T38.6X1\*, T38.7X1\*, T38.801\*, T38.811\*, T38.891\*, T38.901\*, T38.991\*, T39.011\*, T39.091\*, T39.1X1\*,  
T39.2X1\*, T39.311\*, T39.391\*, T39.4X1\*, T39.8X1\*, T39.91\*, T41.0X1\*, T41.1X1\*, T41.201\*, T41.291\*,  
T41.3X1\*, T41.41\*, T41.5X1\*, T42.0X1\*, T42.1X1\*, T42.2X1\*, T42.5X1\*, T42.6X1\*, T42.71\*, T42.8X1\*,  
T43.011\*, T43.021\*, T43.1X1\*, T43.201\*, T43.211\*, T43.221\*, T43.291\*, T43.3X1\*, T43.4X1\*, T43.501\*,  
T43.591\*, T43.601\*, T43.611\*, T43.621\*, T43.631\*, T43.691\*, T43.8X1\*, T43.91\*, T44.0X1\*, T44.1X1\*,  
T44.2X1\*, T44.3X1\*, T44.4X1\*, T44.5X1\*, T44.6X1\*, T44.7X1\*, T44.8X1\*, T44.901\*, T44.991\*,  
T45.0X1\*, T45.1X1\*, T45.2X1\*, T45.3X1\*, T45.4X1\*, T45.511\*, T45.521\*, T45.601\*, T45.611\*, T45.621\*,  
T45.691\*, T45.7X1\*, T45.8X1\*, T45.91\*, T46.0X1\*, T46.1X1\*, T46.2X1\*, T46.3X1\*, T46.4X1\*, T46.5X1\*,  
T46.6X1\*, T46.7X1\*, T46.8X1\*, T46.901\*, T46.991\*, T47.0X1\*, T47.1X1\*, T47.2X1\*, T47.3X1\*,  
T47.4X1\*, T47.5X1\*, T47.6X1\*, T47.7X1\*, T47.8X1\*, T47.91\*, T48.0X1\*, T48.1X1\*, T48.201\*, T48.291\*,  
T48.3X1\*, T48.4X1\*, T48.5X1\*, T48.6X1\*, T48.901\*, T48.991\*, T49.0X1\*, T49.1X1\*, T49.2X1\*,  
T49.3X1\*, T49.4X1\*, T49.5X1\*, T49.6X1\*, T49.7X1\*, T49.8X1\*, T49.91\*, T50.0X1\*, T50.1X1\*,  
T50.2X1\*, T50.3X1\*, T50.4X1\*, T50.5X1\*, T50.6X1\*, T50.7X1\*, T50.8X1\*, T50.A11\*, T50.A21\*,  
T50.A91\*, T50.B11\*, T50.B91\*, T50.Z11\*, T50.Z91\*, T50.901\*, T50.911\*, T50.991\*

*Other poisonings unclear intent:* T36.0X4\*, T36.1X4\*, T36.2X4\*, T36.3X4\*, T36.4X4\*, T36.5X4\*,  
T36.6X4\*, T36.7X4\*, T36.8X4\*, T36.94\*, T37.0X4\*, T37.1X4\*, T37.2X4\*, T37.3X4\*, T37.4X4\*,  
T37.5X4\*, T37.8X4\*, T37.94\*, T38.0X4\*, T38.1X4\*, T38.2X4\*, T38.3X4\*, T38.4X4\*, T38.5X4\*,  
T38.6X4\*, T38.7X4\*, T38.804\*, T38.814\*, T38.894\*, T38.904\*, T38.994\*, T39.014\*, T39.094\*, T39.1X4\*,  
T39.2X4\*, T39.314\*, T39.394\*, T39.4X4\*, T39.8X4\*, T39.94\*, T41.0X4\*, T41.1X4\*, T41.204\*, T41.294\*,  
T41.3X4\*, T41.44\*, T41.5X4\*, T42.0X4\*, T42.1X4\*, T42.2X4\*, T42.5X4\*, T42.6X4\*, T42.74\*, T42.8X4\*,  
T43.014\*, T43.024\*, T43.1X4\*, T43.204\*, T43.214\*, T43.224\*, T43.294\*, T43.3X4\*, T43.4X4\*, T43.504\*,  
T43.594\*, T43.604\*, T43.614\*, T43.624\*, T43.634\*, T43.694\*, T43.8X4\*, T43.94\*, T44.0X4\*, T44.1X4\*,  
T44.2X4\*, T44.3X4\*, T44.4X4\*, T44.5X4\*, T44.6X4\*, T44.7X4\*, T44.8X4\*, T44.904\*, T44.994\*,  
T45.0X4\*, T45.1X4\*, T45.2X4\*, T45.3X4\*, T45.4X4\*, T45.514\*, T45.524\*, T45.604\*, T45.614\*, T45.624\*,  
T45.694\*, T45.7X4\*, T45.8X4\*, T45.94\*, T46.0X4\*, T46.1X4\*, T46.2X4\*, T46.3X4\*, T46.4X4\*, T46.5X4\*,  
T46.6X4\*, T46.7X4\*, T46.8X4\*, T46.904\*, T46.994\*, T47.0X4\*, T47.1X4\*, T47.2X4\*, T47.3X4\*,  
T47.4X4\*, T47.5X4\*, T47.6X4\*, T47.7X4\*, T47.8X4\*, T47.94\*, T48.0X4\*, T48.1X4\*, T48.204\*, T48.294\*,  
T48.3X4\*, T48.4X4\*, T48.5X4\*, T48.6X4\*, T48.904\*, T48.994\*, T49.0X4\*, T49.1X4\*, T49.2X4\*,  
T49.3X4\*, T49.4X4\*, T49.5X4\*, T49.6X4\*, T49.7X4\*, T49.8X4\*, T49.94\*, T50.0X4\*, T50.1X4\*,  
T50.2X4\*, T50.3X4\*, T50.4X4\*, T50.5X4\*, T50.6X4\*, T50.7X4\*, T50.8X4\*, T50.A14\*, T50.A24\*,  
T50.A94\*, T50.B14\*, T50.B94\*, T50.Z14\*, T50.Z94\*, T50.904\*, T50.914\*, T50.994\*

---

**Appendix Table B2:** Frequency of Adverse Events

| <b>Period</b> | <b>Any adverse event</b> | <b>Opioid poisonings</b> | <b>Non-opioid controlled substances poisonings</b> | <b>Other poisonings</b> | <b>Self-harm</b> |
|---------------|--------------------------|--------------------------|----------------------------------------------------|-------------------------|------------------|
| 2007-2017     | 45,756                   | 4,451                    | 5,610                                              | 32,555                  | 3,189            |
| Percent       | 100.0                    | 9.7                      | 12.3                                               | 71.1                    | 7.0              |

*Notes: The data come from Optum's de-identified Clinformatics® Data Mart Database 2007 to 2017. This table reported any adverse encounters of adults prescribed opioid analgesics during 2007-2017. The top 5 ICD-9/ICD-10 for each category were provided in the Appendix Table B3.*

**Appendix Table B3:** Top ICD codes for each adverse event category

| ICD-9<br>(prior to<br>October<br>2015)             | Optum Description                           | Frequency | Cumulative<br>percent | ICD-10<br>(post<br>October<br>2015) | Optum Description                          | Frequency | Cumulative<br>percent |
|----------------------------------------------------|---------------------------------------------|-----------|-----------------------|-------------------------------------|--------------------------------------------|-----------|-----------------------|
| <b>Opioid poisonings</b>                           |                                             |           |                       |                                     |                                            |           |                       |
| 965.09                                             | POISN OPIATES&RELATED<br>NARCOTICS OTH      | 1220      | 40.8                  | T40.2X1A                            | POISON OTH OPIOIDS<br>ACC INITIAL ENC      | 524       | 29.8                  |
| 965.00                                             | POISONING BY OPIUM ,<br>UNSPECIFIED         | 641       | 62.2                  | T40.1X1A                            | POISON HEROIN<br>ACCIDENTAL INIT ENC       | 302       | 47.0                  |
| E950.0                                             | SUI&SLF-PSN-ANALGES-<br>ANTIPYRET           | 387       | 75.2                  | T40.2X2A                            | POISN OTH OPIOIDS<br>SLF-HARM INIT ENC     | 269       | 62.3                  |
| 965.01                                             | POISONING BY HEROIN                         | 297       | 85.1                  | T40.4X1A                            | PSN OTH SYNTH<br>NARCOTIC ACC INIT<br>ENC  | 157       | 71.3                  |
| E980.0                                             | PSN-ANALGES-<br>ANTIPYRET-ANTIRHM-<br>UNDET | 191       | 91.5                  | T40.2X4A                            | POISN OTH OPIOIDS<br>UNDET INITIAL ENC     | 89        | 76.3                  |
| <b>Non-opioid controlled substances poisonings</b> |                                             |           |                       |                                     |                                            |           |                       |
| 969.4                                              | POISN BENZODIAZEPINE-<br>BASED TRANQ        | 3321      | 88.8                  | T42.4X2A                            | POISN<br>BENZODIAZEPINES SLF-<br>HARM INIT | 764       | 37.2                  |
| 967.0                                              | POISONING BY<br>BARBITURATES                | 152       | 92.9                  | T42.4X1A                            | POISON<br>BENZODIAZEPINES ACC<br>INIT ENC  | 696       | 71.0                  |
| 970.81                                             | POISONING BY COCAINE                        | 111       | 95.8                  | T42.4X4A                            | POISN<br>BENZODIAZEPINES<br>UNDET INITIAL  | 168       | 79.2                  |
| E853.2                                             | ACC PSN<br>BENZODIAZEPINE-BASED<br>TRANQ    | 105       | 98.6                  | T42.4X1D                            | POISON<br>BENZODIAZEPINES ACC<br>SUB ENC   | 68        | 82.5                  |
| E980.1                                             | PSN BARBITURATS<br>UNDETRM ACC/PURPOSE      | 24        | 99.3                  | T42.4X2D                            | POISN<br>BENZODIAZEPINES<br>SELF-HARM SUB  | 65        | 85.7                  |
| <b>Other poisonings</b>                            |                                             |           |                       |                                     |                                            |           |                       |

|                  |                                           |      |      |          |                                        |      |      |
|------------------|-------------------------------------------|------|------|----------|----------------------------------------|------|------|
| 977.9            | POISN UNSPEC<br>RX/MEDICINAL<br>SUBSTANCE | 8343 | 38.2 | T50.901A | POISN UNS RX MEDS<br>BIO SUBS ACC INIT | 1887 | 16.1 |
| 965.4            | POISONING AROMATIC<br>ANALGESICS NEC      | 1269 | 44.0 | T50.902A | PSN UNS RX MED BIO<br>SUBS SF-HRM INIT | 1499 | 28.8 |
| 977.8            | POISN OTH SPEC<br>RX&MEDICINAL SBSTNC     | 978  | 48.5 | T50.904A | PSN UNS RX MEDS BIO<br>SUBS UNDET INIT | 974  | 37.1 |
| E950.3           | SUI&SLF-INFLCT PSN-<br>TRANQ&PSYCHOTROP   | 743  | 51.9 | T45.511A | POISN ANTICOAG<br>ACCIDENT INITIAL ENC | 482  | 41.2 |
| 967.8            | POISONING OTHER<br>SEDATIVES&HYPNOTICS    | 636  | 54.8 | T39.1X2A | PSN 4-AMINOPHENOL<br>DER SLF-HARM INIT | 344  | 44.2 |
| <b>Self-harm</b> |                                           |      |      |          |                                        |      |      |
| E956             | SUIE&SLF-INJURY-<br>CUT&PIERC INSTRUM     | 329  | 26.7 | T14.91   | SUICIDE ATTEMPT                        | 1452 | 68.6 |
| E958.9           | SUICIDE&SLF-INFLCTED<br>INJR UNS MEANS    | 291  | 50.4 | T14.91XA | SUICIDE ATTEMPT<br>INITIAL ENCOUNTER   | 184  | 77.3 |
| E950.9           | SUI&SLF-POISN-UNS<br>SOLID&LQD SBSTNC     | 142  | 62.0 | X83.8XXA | INTENTIONAL SH OTH<br>SPECI MEANS INIT | 95   | 81.8 |
| E955.1           | SUICIDE&SELF-INFLICT<br>INJURY SHOTGUN    | 116  | 71.4 | X73.0XXA | SELF-HARM SHOTGUN<br>D/C INITIAL       | 61   | 84.7 |
| E955.0           | SUI&SELF-INFLICT INJURY<br>BY HANDGUN     | 85   | 78.3 | X78.9XXA | INTENTIONL SH UNS<br>SHARP OBJECT INIT | 61   | 87.6 |

Notes: The data come from Optum's de-identified Clinformatics® Data Mart Database 2007 to 2017. This table reported the adverse encounters during 2007-2017 of adults prescribed opioid analgesics with a prior ED/inpatient visit for depression.
